# Supplementary material
Source: MDPI journal article supplement (https://www.mdpi.com/2227-7390/10/12/1994)
Supplement: s1 [file s1]

### III List of DBN nodes

| diagnosis: CD                          |                                                                                                                                          |                                |
|----------------------------------------|------------------------------------------------------------------------------------------------------------------------------------------|--------------------------------|
| Metagenomics                           | Metatranscriptomics                                                                                                                      | metabolites                    |
| [1] "s__Alistipes_putredinis"          | [1] "g__ASPASN-PWY: superpathway of L-aspartate and L-asparagine biosynthesis g__Bacteroides.s__Bacteroides_finegoldii"                  | [1] "m__Arg - Cholate"         |
| [2] "s__Alistipes_sp_HGB5"             | [2] "g__COA-PWY-1: coenzyme A biosynthesis II (mammalian) g__Bacteroides.s__Bacteroides_salyersiae"                                      | [2] "m__C10 carnitine"         |
| [3] "s__Anaerococcus_obesiensis"       | [3] "g__COA-PWY-1: coenzyme A biosynthesis II (mammalian) g__Dysgonomonas.s__Dysgonomonas_mossii"                                        | [3] "m__C12 carnitine"         |
| [4] "s__Anaerococcus_vaginalis"        | [4] "g__COA-PWY-1: coenzyme A biosynthesis II (mammalian) g__Ruminococcus.s__Ruminococcus_calidus"                                       | [4] "m__C12:1 carnitine"       |
| [5] "s__Bacteroides_cellulosilyticus"  | [5] "g__HISDEG-PWY: L-histidine degradation I g__Synergistes.s__Synergistes_sp_3_1_syn1"                                                 | [5] "m__C14:0 SM"              |
| [6] "s__Bacteroides_eggerthii"         | [6] "g__NONMEVIPP-PWY: methylerythritol phosphate pathway I g__Bacteroides.s__Bacteroides_sp_2_1_22"                                     | [6] "m__C14:1 carnitine"       |
| [7] "s__Bacteroides_fluxus"            | [7] "g__NONMEVIPP-PWY: methylerythritol phosphate pathway I g__Dysgonomonas.s__Dysgonomonas_mossii"                                      | [7] "m__C14:2 carnitine"       |
| [8] "s__Bacteroides_fragilis"          | [8] "g__PANTO-PWY: phosphopantothenate biosynthesis I g__Alistipes.s__Alistipes_sp_HGB5"                                                 | [8] "m__C16-OH carnitine"      |
| [9] "s__Bacteroides_massiliensis"      | [9] "g__PANTO-PWY: phosphopantothenate biosynthesis I g__Dysgonomonas.s__Dysgonomonas_gadei"                                             | [9] "m__C18:1 LPC plasmalogen" |
| [10] "s__Bacteroides_ovatus"           | [10] "g__PANTO-PWY: phosphopantothenate biosynthesis I g__Dysgonomonas.s__Dysgonomonas_mossii"                                           | [10] "m__C18:1-OH carnitine"   |
| [11] "s__Bacteroides_sp_1_1_30"        | [11] "g__PEPTIDOGLYCANSYN-PWY: peptidoglycan biosynthesis I (meso-diaminopimelate containing) g__Collinsella.s__Collinsella_aerofaciens" | [11] "m__C20:1 LPC"            |
| [12] "s__Bacteroides_sp_2_1_22"        | [12] "g__PWY-1042: glycolysis IV (plant cytosol) g__Megamonas.s__Megamonas_funiformis"                                                   | [12] "m__C22:6 LPC"            |
| [13] "s__Bacteroides_sp_4_3_47FAA"     | [13] "g__PWY-2942: L-lysine biosynthesis III g__Dysgonomonas.s__Dysgonomonas_gadei"                                                      | [13] "m__C38:3 PC"             |
| [14] "s__Bacteroides_sp_9_1_42FAA"     | [14] "g__PWY-2942: L-lysine biosynthesis III g__Dysgonomonas.s__Dysgonomonas_mossii"                                                     | [14] "m__C38:4 PC plasmalogen" |
| [15] "s__Barnesiella_intestinihominis" | [15] "g__PWY-3001: superpathway of L-isoleucine biosynthesis I g__Megamonas.s__Megamonas_hypermegale"                                    | [15] "m__C38:4 PC"             |

|                                                   |                                                                                                                                                  |                                          |
|---------------------------------------------------|--------------------------------------------------------------------------------------------------------------------------------------------------|------------------------------------------|
| [16] "s__Bifidobacterium_adolescentis"            | [16] "g__PWY-5097: L-lysine biosynthesis VI   g__Dysgonomonas.s__Dysgonomonas_gadei"                                                             | [16] "m__C38:6 PC"                       |
| [17] "s__Butyricicoccus_pullicaecorum"            | [17] "g__PWY-5097: L-lysine biosynthesis VI   g__Dysgonomonas.s__Dysgonomonas_mossii"                                                            | [17] "m__C4 carnitine"                   |
| [18] "s__Butyrivibrio_crossotus"                  | [18] "g__PWY-5188: tetrapyrrole biosynthesis I (from glutamate)   g__Ruminococcus.s__Ruminococcus_callidus"                                      | [18] "m__C46:1 TAG"                      |
| [19] "s__Clostridium_bolteae"                     | [19] "g__PWY-5659: GDP-mannose biosynthesis   g__Alistipes.s__Alistipes_sp_HGB5"                                                                 | [19] "m__C46:2 TAG"                      |
| [20] "s__Collinsella_aerofaciens"                 | [20] "g__PWY-5667: CDP-diacylglycerol biosynthesis   g__Alistipes.s__Alistipes_sp_HGB5"                                                          | [20] "m__C48:3 TAG"                      |
| [21] "s__Collinsella_intestinalis"                | [21] "g__PWY-5667: CDP-diacylglycerol biosynthesis   g__Bacteroides.s__Bacteroides_finegoldii"                                                   | [21] "m__C50:5 TAG"                      |
| [22] "s__Coprococcus_eutactus"                    | [22] "g__PWY-5667: CDP-diacylglycerol biosynthesis   g__Dysgonomonas.s__Dysgonomonas_gadei"                                                      | [22] "m__C52:6 TAG"                      |
| [23] "s__Coprococcus_sp_ART55_1"                  | [23] "g__PWY-5667: CDP-diacylglycerol biosynthesis   g__Dysgonomonas.s__Dysgonomonas_mossii"                                                     | [23] "m__C52:7 TAG"                      |
| [24] "s__Desulfovibrio_desulfuricans"             | [24] "g__PWY-5686: UMP biosynthesis   g__Bacteroides.s__Bacteroides_finegoldii"                                                                  | [24] "m__C58:10 TAG"                     |
| [25] "s__Dorea_longicatena"                       | [25] "g__PWY-5690: TCA cycle II (plants and fungi)   g__Megamonas.s__Megamonas_funiformis"                                                       | [25] "m__Citruiline - Cholate"           |
| [26] "s__Dysgonomonas_gadei"                      | [26] "g__PWY-5695: urate biosynthesis/inosine 5'-phosphate degradation   g__Dysgonomonas.s__Dysgonomonas_gadei"                                  | [26] "m__Citruiline - chenodeoxycholate" |
| [27] "s__Dysgonomonas_mossii"                     | [27] "g__PWY-5695: urate biosynthesis/inosine 5'-phosphate degradation   g__Dysgonomonas.s__Dysgonomonas_mossii"                                 | [27] "m__Isoallolithocholate [2M-H] -"   |
| [28] "s__Erysipelotrichaceae_bacterium_5_2_54FAA" | [28] "g__PWY-6121: 5-aminoimidazole ribonucleotide biosynthesis   g__Alistipes.s__Alistipes_sp_HGB5"                                             | [28] "m__N1-acetylserpine"               |
| [29] "s__Eubacterium_biforme"                     | [29] "g__PWY-6147: 6-hydroxymethyl-dihydropterin diphosphate biosynthesis   g__Bacteroides.s__Bacteroides_sp_2_1_22"                             | [29] "m__NH4_C22:1 MAG"                  |
| [30] "s__Eubacterium_dolichum"                    | [30] "g__PWY-6386: UDP-N-acetyl/muramoyl-pentapeptide biosynthesis II (lysine-containing)   g__Dysgonomonas.s__Dysgonomonas_mossii"              | [30] "m__NH4_C46:3 TAG"                  |
| [31] "s__Haemophilus_pittmaniae"                  | [31] "g__PWY-6387: UDP-N-acetyl/muramoyl-pentapeptide biosynthesis I (meso-diaminopimelate containing)   g__Dysgonomonas.s__Dysgonomonas_mossii" | [31] "m__NH4_C48:3 TAG"                  |
| [32] "s__Lautropia_mirabilis"                     | [32] "g__PWY-6700: queuosine biosynthesis   g__Dysgonomonas.s__Dysgonomonas_mossii"                                                              | [32] "m__NH4_C56:1 TAG"                  |
| [33] "s__Megamonas_funiformis"                    | [33] "g__PWY-6703: preQ0 biosynthesis   g__Dysgonomonas.s__Dysgonomonas_mossii"                                                                  | [33] "m__Val - chenodeoxycholate"        |

|                                               |                                                                                                                         |                                   |
|-----------------------------------------------|-------------------------------------------------------------------------------------------------------------------------|-----------------------------------|
| [34] "s__Megamonas_rupellensis"               | [34] "g__PWY-7111: pyruvate fermentation to isobutanol (engineered) g__Haemophilus.s__Haemophilus_pittmaniae"           | [34] "m__alpha-hydroxymetoprolol" |
| [35] "s__Odoribacter_laneus"                  | [35] "g__PWY-7199: pyrimidine deoxyribonucleosides salvage g__Alistipes.s__Alistipes_sp_HGB5"                           | [35] "m__biotin"                  |
| [36] "s__Odoribacter_splanchnicus"            | [36] "g__PWY-7208: superpathway of pyrimidine nucleobases salvage g__Desulfovibrio.s__Desulfovibrio_desulfuricans"      | [36] "m__cinnamoylglycine"        |
| [37] "s__Parabacteroides_goldsteinii"         | [37] "g__PWY-7219: adenosine ribonucleotides de novo biosynthesis g__Alistipes.s__Alistipes_sp_HGB5"                    | [37] "m__dTMP"                    |
| [38] "s__Parabacteroides_sp_D13"              | [38] "g__PWY-7219: adenosine ribonucleotides de novo biosynthesis g__Dysgonomonas.s__Dysgonomonas_gadei"                | [38] "m__dihydroorotate"          |
| [39] "s__Paraprevotella_xylaniphila"          | [39] "g__PWY-7219: adenosine ribonucleotides de novo biosynthesis g__Dysgonomonas.s__Dysgonomonas_mossii"               | [39] "m__epiandrosterone"         |
| [40] "s__Peptoniphilus_duerdenii"             | [40] "g__PWY-7219: adenosine ribonucleotides de novo biosynthesis g__Synergistes.s__Synergistes_sp_3_1_syn1"            | [40] "m__furosemide"              |
| [41] "s__Phascolarctobacterium_succinatutens" | [41] "g__PWY-7221: guanosine ribonucleotides de novo biosynthesis g__Dysgonomonas.s__Dysgonomonas_mossii"               | [41] "m__furoylglycine"           |
| [42] "s__Prevotella_stercorea"                | [42] "g__PWY-7228: superpathway of guanosine nucleotides de novo biosynthesis I g__Dysgonomonas.s__Dysgonomonas_mossii" | [42] "m__gabapentin"              |
| [43] "s__Prevotella_timonensis"               | [43] "g__PWY0-1319: CDP-diacylglycerol biosynthesis II g__Alistipes.s__Alistipes_sp_HGB5"                               | [43] "m__guanidoacetic acid"      |
| [44] "s__Pseudomonas_aeruginosa"              | [44] "g__PWY0-1319: CDP-diacylglycerol biosynthesis II g__Bacteroides.s__Bacteroides_finegoldii"                        | [44] "m__heptanoate"              |
| [45] "s__Ruminococcus_bromii"                 | [45] "g__PWY0-1319: CDP-diacylglycerol biosynthesis II g__Dysgonomonas.s__Dysgonomonas_gadei"                           | [45] "m__hydrochlorothiazide"     |
| [46] "s__Ruminococcus_callidus"               | [46] "g__PWY0-1319: CDP-diacylglycerol biosynthesis II g__Dysgonomonas.s__Dysgonomonas_mossii"                          | [46] "m__nicotinuric acid"        |
| [47] "s__Ruminococcus_champanellensis"        | [47] "g__PYRIDOXYN-PWY: pyridoxal 5'-phosphate biosynthesis I g__Dysgonomonas.s__Dysgonomonas_mossii"                   | [47] "m__porphobilinogen"         |
| [48] "s__Ruminococcus_obeum"                  | [48] "g__UNINTEGRATED g__Clostridium.s__Clostridium_symbiosum"                                                          | [48] "m__quinine"                 |
| [49] "s__Streptococcus_intermedius"           | [49] "g__UNINTEGRATED g__Lachnospiraceae_noname.s__Lachnospiraceae_bacterium_2_1_58FAA"                                 | [49] "m__sulfapyridine"           |
| [50] "s__Synergistes_sp_3_1_syn1"             | [50] "g__VALSYN-PWY: L-valine biosynthesis g__Haemophilus.s__Haemophilus_pittmaniae"                                    | [50] "m__xanthurenate"            |
